# Supplementary material for: Embedding of a gold nanofin array in a polymer film to create transparent, flexible and anisotropic electrodes
Source: Royal Society of Chemistry journal article supplement (doi:10.1039/b819290a), 2009-01-01
Supplement: b819290a.pdf [file b819290a.pdf]

### Supplementary Information

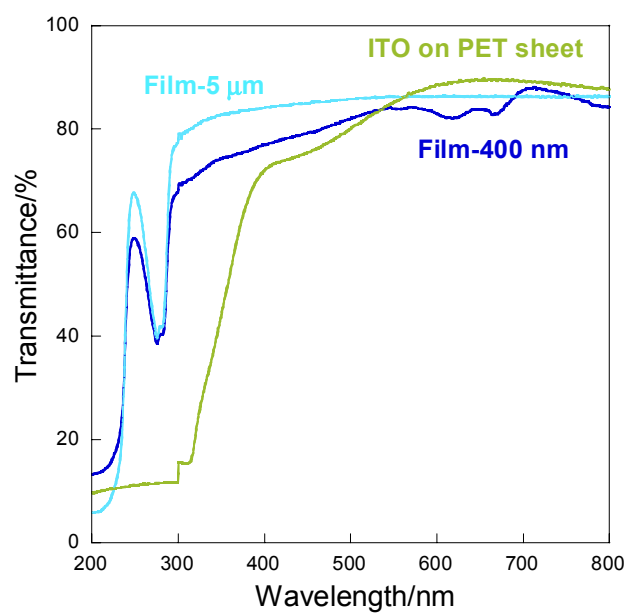

Fig. S1 Transmission spectra of Au nanofin films and ITO on PET sheet.

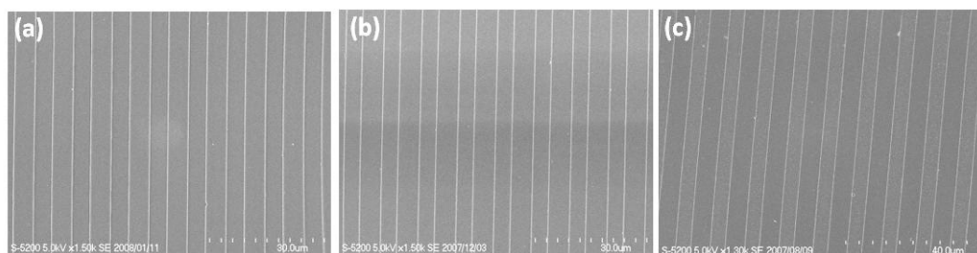

Fig. S2 Surface images of the metal fin-embedded polymer film.

The stripes corresponds to the embedded metal nanofins. The metals are Pt (a) , Ni (b), and Ag (c). Pt was sputtered on the film surface with the same condition of Au sputtering. Ni and Ag layer was prepared by electroless plating. Plating conditions was followed the reported method. (Ref. 16).
